# Supplementary material
Source: publisher figshare collection journal article supplement (https://acs.figshare.com/ndownloader/files/4489729)
Supplement: Supplementary file 1 [file 4489729]

**Supporting Information for**  
**“Protonic Gating of Excited-State Twisting and Charge Localization in**  
**GFP Chromophores: A Mechanistic Hypothesis for Reversible**  
**Photoswitching”**

*Seth Olsen, Krissie Lamothe and Todd J. Martínez*

- I. Illustration of Photoswitching Scheme – p. 2
- II. AIMS Simulations – p. 3
- III. Synchronous Transit Plots – p. 6
- IV. Propriety of the Electronic Structure Ansatz – p. 12
- V. Two-Dimensional Interpolation Surfaces - p. 17
- VI. References – p. 19

# I. Schematic Depiction of Hypothetical Photoswitching Mechanism

A Mechanism for Reversible Photoswitching Based on the Chemistry of the Chromophore

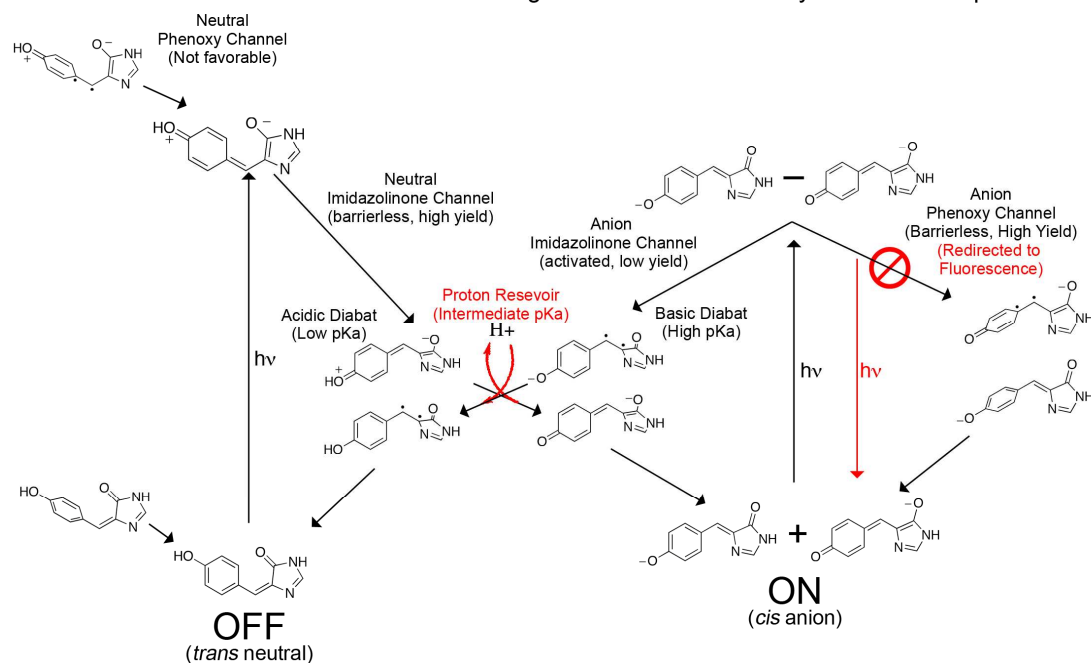

Here, we show a schematic outline of a proposed mechanistic hypothesis for RSFP photoswitching based on the chemistry of the HBI chromophore. Roles for which we invoke the protein are highlighted in red. The reader may verify that the Lewis structures drawn here are consistent with the  $S_1$ - $S_0$  difference density isosurfaces shown in Fig. 2 of the main text. Energies are not drawn to scale.

## II: AIMS Simulations

AIMS simulations were carried out using an implementation<sup>1</sup> within the Molpro<sup>2</sup> software. The electronic structure model was generated using a 2-electron, 2-orbital, 2-state-averaged<sup>3</sup> complete active space self consistent field<sup>4</sup> ansatz with a 6-31G Gaussian basis set<sup>5-7</sup> (SA2-CAS(2,2)/6-31G). The timestep was 20a.u. Initial conditions were sampled from a Wigner distribution generated with the  $S_0$  minimum and normal modes calculated using MP2<sup>8</sup>/6-31G\*\*.<sup>5-7</sup> Trajectories were propagated for 20000 a.u. Tables S1.1 and S1.4 describe geometries used to generate the Wigner distribution for anionic and neutral HBI, respectively. Tables S1.2-S1.3 and S1.5-S1.6 list the SA2-CAS(2,2)/6-31G state-specific energies, harmonic frequencies, and natural orbitals and occupation numbers at these geometries.

The MR-RSPT2<sup>9</sup> excitation energy at the SA2-CAS(2,2)/6-31G  $S_0$  minimum of anionic HBI is 2.55eV (468nm). This is quite close to the absorption energy of wild-type GFP (2.61eV; 475nm)<sup>10</sup> and the gas-phase absorption maximum of a GFP chromophore model in its anionic state (2.59eV; 479nm).<sup>11</sup> The MR-RSPT2 excitation of neutral HBI is 3.38eV (367nm), which is in slightly worse agreement with the relevant protein absorption (3.14eV; 397nm)<sup>10</sup> and (corrected) gas phase absorption maxima (3.11eV; 399nm).<sup>12</sup>

**Table S1.1.** Cartesian coordinates (a.u.) for anionic HBI used to generate the initial distribution for AIMS simulations. Geometry was generated via optimization with MP2/6-31G\*\*.

|   |          |          |          |
|---|----------|----------|----------|
| N | 0.00023  | 0.02264  | 0.00827  |
| N | 0.00239  | 0.77965  | -2.10943 |
| H | -0.00099 | 0.02721  | 1.01390  |
| H | -0.00191 | 2.12329  | -0.46607 |
| H | 0.00849  | -2.50685 | -2.96481 |
| H | 0.00573  | 0.98916  | -4.48510 |
| H | 0.00891  | 1.35096  | -6.93670 |
| H | 0.01607  | -2.91424 | -7.57727 |
| H | 0.01289  | -3.27044 | -5.13169 |
| C | 0.00008  | 1.10898  | -0.83967 |
| C | 0.00445  | -0.62319 | -2.12224 |
| C | 0.00309  | -1.15891 | -0.76587 |
| C | 0.00739  | -1.45104 | -3.23701 |
| C | 0.00914  | -1.17016 | -4.61287 |
| C | 0.00800  | 0.14941  | -5.16885 |
| C | 0.00984  | 0.34719  | -6.52491 |
| C | 0.01294  | -0.74482 | -7.48993 |
| C | 0.01391  | -2.07163 | -6.89442 |
| C | 0.01205  | -2.26089 | -5.53691 |
| O | 0.00411  | -2.31093 | -0.30035 |
| O | 0.01420  | -0.55340 | -8.73406 |

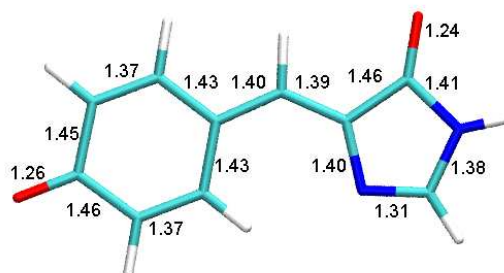

**Table S1.2.** SA2-CAS(2,2)/6-31G wavefunction (natural orbitals and occupation numbers) at the geometry of anionic HBI detailed in Table S1.1. State Energies:  $E(S_0) = -641.129989161311$  a.u.,  $E(S_1) = -640.979139746473$  a.u.

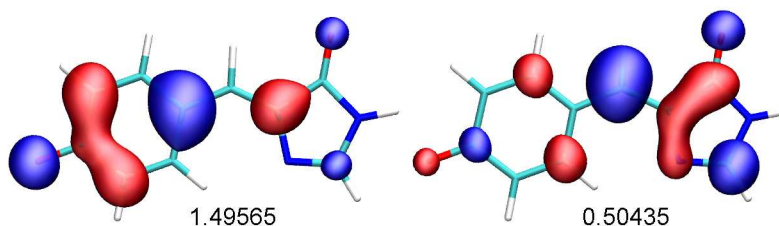

**Table S1.3.** MP2/6-31G\*\* harmonic frequencies ( $\text{cm}^{-1}$ ) used to generate the ground state Wigner distribution for HBI anion.

|                 |                 |                 |                 |
|-----------------|-----------------|-----------------|-----------------|
| 52.4121000000   | 61.6593000000   | 101.7936000000  | 116.7688000000  |
| 183.2224000000  | 213.5570000000  | 240.2600000000  | 284.7446000000  |
| 334.4425000000  | 368.3210000000  | 400.1006000000  | 450.2914000000  |
| 463.9662000000  | 480.9397000000  | 555.1830000000  | 591.6552000000  |
| 622.0361000000  | 647.0939000000  | 692.9289000000  | 700.9552000000  |
| 749.5135000000  | 775.1792000000  | 802.6306000000  | 810.9847000000  |
| 838.6382000000  | 868.9889000000  | 882.8089000000  | 914.0303000000  |
| 914.9919000000  | 924.6879000000  | 997.1300000000  | 1080.9844000000 |
| 1102.6779000000 | 1123.6264000000 | 1200.6318000000 | 1226.4316000000 |
| 1296.1302000000 | 1322.9570000000 | 1330.1992000000 | 1389.4409000000 |
| 1417.2462000000 | 1420.1290000000 | 1485.3904000000 | 1530.7001000000 |
| 1563.4814000000 | 1596.3911000000 | 1645.7286000000 | 1695.7173000000 |
| 1727.3166000000 | 1782.0950000000 | 3181.3867000000 | 3197.5202000000 |
| 3235.9754000000 | 3245.1497000000 | 3269.4591000000 | 3285.0180000000 |
| 3746.4533000000 |                 |                 |                 |

**Table S1.4.** Cartesian coordinates (a.u.) for neutral HBI used to generate the initial distribution for AIMS simulations ('Geometry.dat' file). Geometry was generated via optimization with MP2/6-31G\*\*. Structure is shown at right with bond lengths in Å.

|   |          |          |          |
|---|----------|----------|----------|
| N | -0.01502 | 0.00026  | -0.05085 |
| H | -0.01976 | 0.00074  | 0.95599  |
| C | 1.08756  | -0.00011 | -0.87987 |
| H | 2.08898  | 0.00013  | -0.47340 |
| N | 0.81731  | -0.00077 | -2.15707 |
| C | -0.58881 | -0.00091 | -2.22018 |
| C | -1.16969 | -0.00017 | -0.84788 |
| O | -2.33157 | -0.00009 | -0.45898 |
| C | -1.37597 | -0.00157 | -3.32725 |
| H | -2.44144 | -0.00152 | -3.10878 |
| C | -1.00098 | -0.00231 | -4.72707 |
| C | 0.33519  | -0.00245 | -5.17491 |
| H | 1.13600  | -0.00199 | -4.44924 |
| C | 0.61915  | -0.00318 | -6.53528 |
| H | 1.65093  | -0.00328 | -6.87088 |
| C | -0.41798 | -0.00378 | -7.47563 |
| C | -1.74917 | -0.00365 | -7.04927 |
| H | -2.53641 | -0.00411 | -7.79111 |
| C | -2.03028 | -0.00292 | -5.68993 |
| H | -3.06283 | -0.00282 | -5.35989 |
| O | -0.19636 | -0.00450 | -8.82712 |
| H | 0.75694  | -0.00451 | -8.98240 |

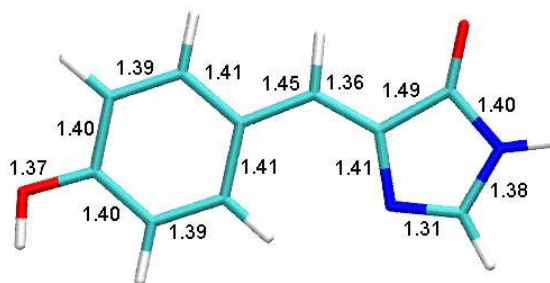

**Table S1.5.** SA2-CAS(2,2)/6-31G wavefunction (natural orbitals and occupation numbers) at the geometry of neutral HBI detailed in Table S1.4. State Energies:  $E(S_0) = -641.684182702957$  a.u.,  $E(S_1) = -641.500871462917$  a.u.

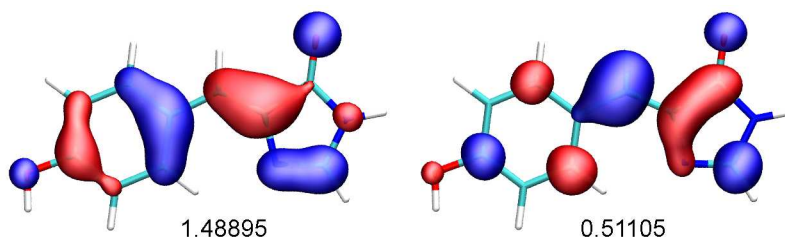

**Table S1.6.** MP2/6-31G\*\* harmonic frequencies ( $\text{cm}^{-1}$ ) used to generate the ground state Wigner distribution for HBI neutral.

|                 |                 |                 |                 |
|-----------------|-----------------|-----------------|-----------------|
| 37.9758000000   | 58.7536000000   | 105.5490000000  | 124.4259000000  |
| 196.8427000000  | 213.8970000000  | 278.6459000000  | 285.4077000000  |
| 345.8032000000  | 359.8814000000  | 389.1073000000  | 407.5105000000  |
| 416.8618000000  | 485.2122000000  | 496.4213000000  | 508.9146000000  |
| 596.5547000000  | 634.1109000000  | 642.9239000000  | 687.2128000000  |
| 730.3536000000  | 780.7820000000  | 801.7022000000  | 807.4762000000  |
| 857.1062000000  | 871.2237000000  | 878.6276000000  | 882.5684000000  |
| 894.0829000000  | 905.0130000000  | 908.7633000000  | 1041.0747000000 |
| 1071.4765000000 | 1117.5213000000 | 1147.6811000000 | 1216.0840000000 |
| 1222.8420000000 | 1235.0734000000 | 1297.5624000000 | 1330.7921000000 |
| 1345.7579000000 | 1376.3793000000 | 1410.8831000000 | 1436.8938000000 |
| 1466.9376000000 | 1510.2582000000 | 1578.8514000000 | 1600.9598000000 |
| 1656.2681000000 | 1691.0027000000 | 1725.1061000000 | 1833.7879000000 |
| 3216.3306000000 | 3238.1114000000 | 3250.0879000000 | 3284.8936000000 |
| 3295.7018000000 | 3301.2328000000 | 3739.6254000000 | 3872.9800000000 |

**Figure S1.7.** Population dynamics for anionic HBI. Dotted lines are population traces for individual runs and solid line is average over all runs.

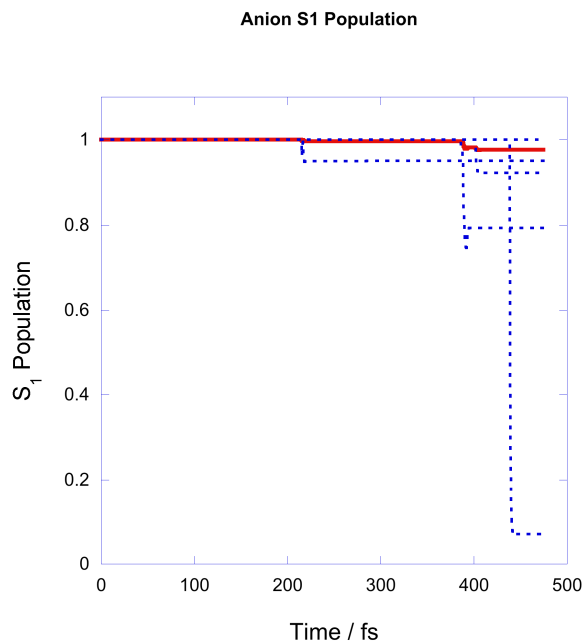

**Figure S1.8.** Population dynamics for neutral HBI. Dotted lines are population traces for individual runs and solid line is average over all runs.

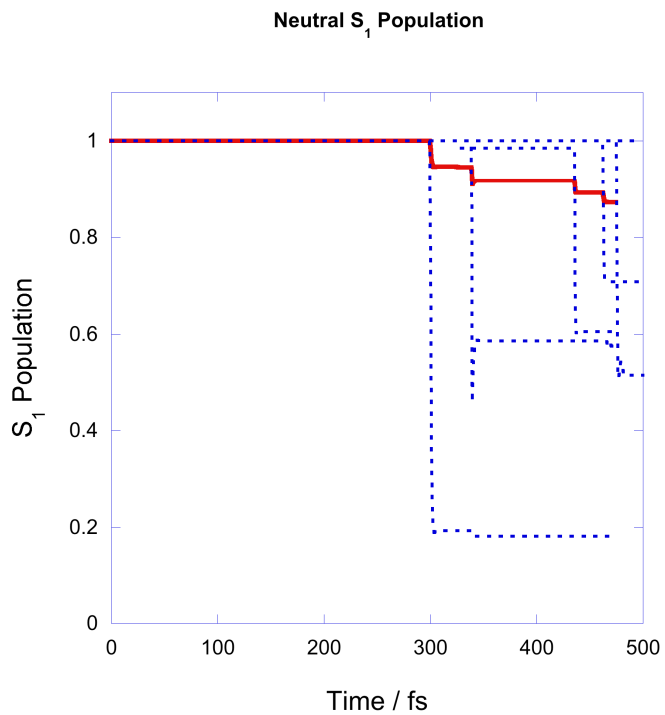

### III: Synchronous Transit Plots

Figure 2 displays two synchronous transit plots each for neutral and anionic HBI. One of these is for imidazolinone torsion; one is for phenoxy (phenol) torsion. Each slice begins with the SA2-CAS(2,2)/6-31G  $S_0$  minimum geometry and terminates with a imidazolinone or phenoxy twisted structure. In the anionic case, the twisted structures are minima on the  $S_1$  surface. In the neutral case, the imidazolinone-twisted structure is a true  $S_1$  minimum and the phenoxy-twisted structure was produced by minimization on  $S_1$  under constraint of the dihedrals spanning the bridge-phenol bond. The interpolations were performed in Z-matrix internal coordinates. The symbolic Z-matrices can be found in this section in tables S2.1 (anion) and S2.5 (neutral). Data pertaining to the anchor points can be found in tables S2.2, S2.3 and S2.4 (anion) and S2.5, S2.6 and S2.7 (neutral). Z-matrix variables, SA2-CAS(2,2)/6-31G state energies, and state averaged natural orbitals and occupation numbers are displayed. Multi-reference 2<sup>nd</sup> order Rayleigh-Schrödinger perturbation theory calculations were performed, which correlated only the highest-lying 32 canonical MCSCF orbitals.





**Table S2.3.** SA2-CAS(2,2)/6-31G wavefunction (natural orbitals and occupation numbers) at the SA2-CAS(2,2)/6-31G imidazolinone-twisted  $S_1$  minimum geometry of anionic HBI.

|                       |                        |                        |
|-----------------------|------------------------|------------------------|
| RNH1 = 0.98898101     | ACCC7 = 127.1034211    | DHCCC12 = 179.915215   |
| RCN2 = 1.36972246     | DCCCC6 = -1.53702504   | RCC15 = 1.43664735     |
| ACNH1 = 127.527152    | RCH9 = 1.07606855      | ACCC14 = 122.490857    |
| RCH3 = 1.06593287     | AHCC8 = 116.4758056    | DCCCC13 = 0.0293163    |
| AHCN2 = 122.6267664   | DHCCC7 = 89.23177397   | RCC16 = 1.43825092     |
| DHCNH1 = -0.19245716  | RCC10 = 1.41377277     | ACCC15 = 114.5621832   |
| RCN4 = 1.29988569     | ACCC9 = 124.8932657    | DCCCC14 = -0.07494423  |
| ANCN3 = 112.6614255   | DCCCN8 = 89.13391817   | RCH17 = 1.07419354     |
| DNCNH2 = -180.2508357 | RCC11 = 1.42034181     | AHCC16 = 116.9249932   |
| RCN5 = 1.38888806     | ACCC10 = 123.9568131   | DHCCC15 = 180.0404366  |
| ACNC4 = 107.8602641   | DCCCC9 = 0             | RCC18 = 1.3643568      |
| DCNCN3 = -0.38929474  | RCH12 = 1.07572478     | ACCC17 = 122.281233    |
| RCC6 = 1.46776178     | AHCC11 = 118.6981392   | DCCCC16 = 0.01824928   |
| ACCN5 = 107.7756662   | DHCCC10 = -0.35453096  | RCH19 = 1.07752641     |
| DCCNC4 = 0.80716738   | RCC13 = 1.3666297      | AHCC18 = 117.9978866   |
| RCO7 = 1.22686531     | ACCC12 = 122.5080952   | DHCCC17 = -180.0990483 |
| AOCN6 = 124.5667835   | DCCCC11 = -179.9317025 | RCO20 = 1.27048623     |
| DOCNC5 = -178.2331084 | RCH14 = 1.07413308     | AOCC19 = 122.6399864   |
| RCC8 = 1.44643914     | AHCC13 = 120.6359164   | DOCCC18 = -179.87464   |

State Energies:  $E(S_0) = -641.057725851047 \text{ a.u.}$ ,  $E(S_1) = -641.028987216418 \text{ a.u.}$

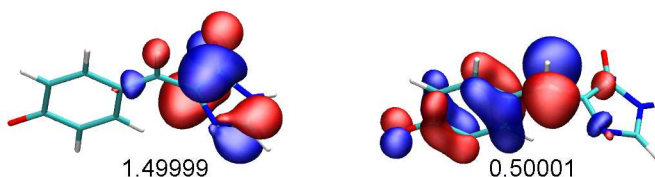

**Table S2.4.** SA2-CAS(2,2)/6-31G wavefunction (natural orbitals and occupation numbers) at the SA2-CAS(2,2)/6-31G phenoxy-twisted  $S_1$  minimum geometry of anionic HBI.

|                       |                       |                        |
|-----------------------|-----------------------|------------------------|
| RNH1 = 0.98804731     | ACCC7 = 126.3143928   | DHCCC12 = 180.0378176  |
| RCN2 = 1.38144953     | DCCC06 = -0.01406547  | RCC15 = 1.45292565     |
| ACNH1 = 127.7510349   | RCH9 = 1.074493       | ACCC14 = 121.3036302   |
| RCH3 = 1.06619312     | AHCC8 = 118.4580337   | DCCCC13 = 0.25477269   |
| AHCN2 = 123.0248017   | DHCCC7 = -0.00217385  | RCC16 = 1.45290763     |
| DHCNH1 = -0.0018087   | RCC10 = 1.46689321    | ACCC15 = 116.1733169   |
| RCN4 = 1.29279084     | ACCC9 = 123.0857428   | DCCCC14 = 0.65176314   |
| ANCN3 = 111.0975668   | DCCCN8 = -0.0100309   | RCH17 = 1.07242624     |
| DNCNH2 = -180.0030577 | RCC11 = 1.43139666    | AHCC16 = 116.7601303   |
| RCN5 = 1.40381921     | ACCC10 = 121.6120072  | DHCCC15 = 179.1490988  |
| ACNC4 = 107.3762956   | DCCCC9 = 90.74036231  | RCC18 = 1.35288832     |
| DCNCN3 = 0.00287636   | RCH12 = 1.07207965    | ACCC17 = 121.3012906   |
| RCC6 = 1.42159756     | AHCC11 = 117.1923516  | DCCCC16 = -0.64445161  |
| ACCN5 = 109.3176481   | DHCCC10 = -2.75442664 | RCH19 = 1.07208034     |
| DCCNC4 = -0.0029787   | RCC13 = 1.35288801    | AHCC18 = 117.1902519   |
| RCO7 = 1.26372224     | ACCC12 = 122.2219344  | DHCCC17 = -178.6555591 |
| AOCN6 = 123.822966    | DCCCC11 = -182.550239 | RCO20 = 1.24633245     |
| DOCNC5 = -179.9955951 | RCH14 = 1.07242572    | AOCC19 = 121.9165653   |
| RCC8 = 1.40227331     | AHCC13 = 121.9392931  | DOCCC18 = -180.7506295 |

State Energies:  $E(S_0) = -641.066602608222a.u.$ ,  $E(S_1) = -641.028986128020a.u.$

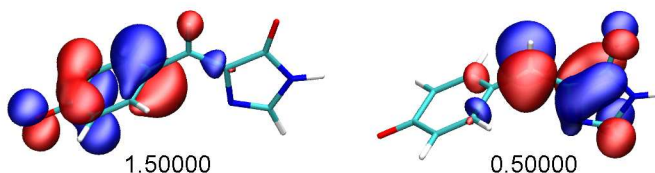

**Table S2.5.** Symbolic Z-Matrix for neutral HBI used to generate the synchronous transit plots in Figure 2. Heavy atom naming system is indicated at right.

|          |     |        |     |         |     |
|----------|-----|--------|-----|---------|-----|
| N3I;     |     |        |     |         |     |
| H1N3I,   | 1,  | RNH1;  |     |         |     |
| C4I,     | 1,  | RCN2,  | 2,  | ACNH1;  |     |
| H1C4I,   | 3,  | RCH3,  | 1,  | AHCN2,  | 2,  |
| N5I,     | 3,  | RCN4,  | 1,  | ANCN3,  | 2,  |
| C1I,     | 5,  | RCN5,  | 3,  | ACNC4,  | 1,  |
| C2I,     | 6,  | RCC6,  | 5,  | ACCN5,  | 3,  |
| O1C2I,   | 7,  | RCO7,  | 1,  | AOCN6,  | 3,  |
| C1B,     | 6,  | RCC8,  | 7,  | ACCC7,  | 8,  |
| H1C1B,   | 9,  | RCH9,  | 6,  | AHCC8,  | 7,  |
| C1P,     | 9,  | RCC10, | 6,  | ACCC9,  | 5,  |
| C2P,     | 11, | RCC11, | 9,  | ACCC10, | 6,  |
| H1C2P,   | 12, | RCH12, | 11, | AHCC11, | 9,  |
| C3P,     | 12, | RCC13, | 11, | ACCC12, | 9,  |
| H1C3P,   | 14, | RCH14, | 12, | AHCC13, | 11, |
| C4P,     | 14, | RCC15, | 12, | ACCC14, | 11, |
| C5P,     | 16, | RCC16, | 14, | ACCC15, | 12, |
| H1C5P,   | 17, | RCH17, | 16, | AHCC16, | 14, |
| C6P,     | 17, | RCC18, | 16, | ACCC17, | 14, |
| H1C6P,   | 19, | RCH19, | 11, | AHCC18, | 12, |
| O1C4P,   | 16, | RCO20, | 17, | AOCC19, | 19, |
| H1O1C4P, | 21, | ROH21, | 16, | AHOC20, | 17, |

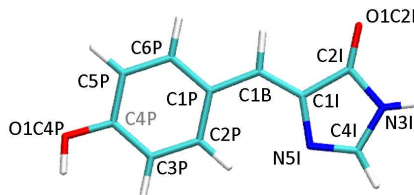

**Table S2.6.** Z-Matrix variables, SA2-CAS(2,2)/6-31G state-specific energies, state-averaged natural orbitals and occupation numbers at the SA2-CAS(2,2)/6-31G  $S_0$  minimum geometry of neutral HBI.

|                   |                     |                     |
|-------------------|---------------------|---------------------|
| RNH1 = 0.99024568 | ACNH1 = 127.0264361 | AHCN2 = 122.0994418 |
| RCN2 = 1.38309897 | RCH3 = 1.06567993   | DHCNH1 = 0.00005509 |

|                       |                        |                        |
|-----------------------|------------------------|------------------------|
| RCN4 = 1.2837399      | RCC10 = 1.43634501     | RCC16 = 1.38575624     |
| ANCN3 = 112.842033    | ACCC9 = 130.7417748    | ACCC15 = 120.5673127   |
| DNCNH2 = -179.9994849 | DCCCN8 = -0.00895221   | DCCCC14 = -0.00797625  |
| RCN5 = 1.40732981     | RCC11 = 1.39766411     | RCH17 = 1.07049408     |
| ACNC4 = 106.8400836   | ACCC10 = 123.8267263   | AHCC16 = 119.0710828   |
| DCNCN3 = -0.00044335  | DCCCC9 = 0.00201811    | DHCCC15 = 180.0051979  |
| RCC6 = 1.46206112     | RCH12 = 1.06979664     | RCC18 = 1.37850434     |
| ACCN5 = 108.5538833   | AHCC11 = 119.5094351   | ACCC17 = 119.1814246   |
| DCCNC4 = 0.00023353   | DHCCC10 = 0.00922103   | DCCCC16 = 0.00590629   |
| RCO7 = 1.22524578     | RCC13 = 1.38432545     | RCH19 = 1.07412736     |
| AOCN6 = 126.3214916   | ACCC12 = 120.6213968   | AHCC18 = 119.3980212   |
| DOCNC5 = -179.9973339 | DCCCC11 = -180.0046082 | DHCCC17 = -180.0044008 |
| RCC8 = 1.36142108     | RCH14 = 1.07418046     | RCO20 = 1.37392175     |
| ACCC7 = 123.4447473   | AHCC13 = 119.7879747   | AOCC19 = 116.9577667   |
| DCCCO6 = -0.00760777  | DHCCC12 = 180.0038069  | DOCCC18 = -179.9918007 |
| RCH9 = 1.07660804     | RCC15 = 1.3859778      | ROH21 = 0.94969921     |
| AHCC8 = 113.6979676   | ACCC14 = 119.9990346   | AHOC20 = 114.8967055   |
| DHCCC7 = -0.00484638  | DCCCC13 = 0.00875214   | DHOCC19 = 179.982536   |

State Energies:  $E(S_0) = -641.689768624901 \text{ a.u.}$ ,  $E(S_1) = -641.504617086528 \text{ a.u.}$

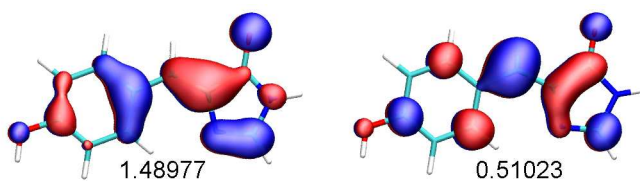

**Table S2.7.** Z-Matrix variables, SA2-CAS(2,2)/6-31G state-specific energies, natural orbitals, and occupation numbers at the SA2-CAS(2,2)/6-31G imidazolinone-twisted  $S_1$  minimum geometry (I- $S_1$ ) of neutral HBI.

|                       |                        |                        |
|-----------------------|------------------------|------------------------|
| RNH1 = 0.98941966     | DCCCO6 = 4.99940588    | ACCC14 = 119.1036035   |
| RCN2 = 1.37878661     | RCH9 = 1.08485622      | DCCCC13 = -0.1557123   |
| ACNH1 = 127.4511892   | AHCC8 = 119.339896     | RCC16 = 1.40463975     |
| RCH3 = 1.0647052      | DHCCC7 = 86.23092499   | ACCC15 = 121.8746539   |
| AHCN2 = 123.3527032   | RCC10 = 1.38554289     | DCCCC14 = 0.11233919   |
| DHCNH1 = 0.80672723   | ACCC9 = 125.737175     | RCH17 = 1.06928865     |
| RCN4 = 1.29242572     | DCCCN8 = 92.29029272   | AHCC16 = 118.4936529   |
| ANCN3 = 111.1783765   | RCC11 = 1.42024789     | DHCCC15 = 180.150447   |
| DNCNH2 = -179.2886177 | ACCC10 = 120.633589    | RCC18 = 1.36244462     |
| RCN5 = 1.40183974     | DCCCC9 = 0             | ACCC17 = 118.8188881   |
| ACNC4 = 105.7658972   | RCH12 = 1.07015723     | DCCCC16 = -0.12323916  |
| DCNCN3 = -0.2555019   | AHCC11 = 117.9025773   | RCH19 = 1.07294477     |
| RCC6 = 1.40107804     | DHCCC10 = -0.04238455  | AHCC18 = 118.9496354   |
| ACCN5 = 111.5234395   | RCC13 = 1.3698882      | DHCCC17 = -180.3256259 |
| DCCNC4 = 0.70226806   | ACCC12 = 120.6584656   | RCO20 = 1.34337353     |
| RCO7 = 1.26157638     | DCCCC11 = -180.2359945 | AOCC19 = 116.0583428   |
| AOCN6 = 125.3598727   | RCH14 = 1.07222171     | DOCCC18 = -180.1210721 |
| DOCNC5 = -180.1556941 | AHCC13 = 120.8028564   | ROH21 = 0.95151869     |
| RCC8 = 1.43891505     | DHCCC12 = 180.1863061  | AHOC20 = 116.7636177   |
| ACCC7 = 125.9177922   | RCC15 = 1.39902907     | DHOCC19 = 180.640953   |

State Energies:  $E(S_0) = -641.591432700723 \text{ a.u.}$ ,  $E(S_1) = -641.567861072717 \text{ a.u.}$

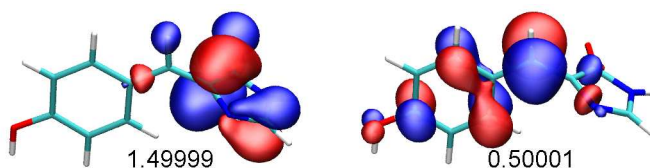

**Table S2.8.** Z-Matrix variables, SA2-CAS(2,2)/6-31G wavefunction (natural orbitals and occupation numbers) at the SA2-CAS(2,2)/6-31G phenoxy-twisted constrained  $S_1$ -minimized geometry of neutral HBI.

|                       |                        |                        |
|-----------------------|------------------------|------------------------|
| RNH1 = 0.9890551      | DCCCO6 = -0.21265435   | ACCC14 = 118.9072932   |
| RCN2 = 1.37672306     | RCH9 = 1.07257927      | DCCCC13 = 0.57171643   |
| ACNH1 = 127.3130858   | AHCC8 = 122.2621973    | RCC16 = 1.4152541      |
| RCH3 = 1.06543325     | DHCCC7 = 0.95465654    | ACCC15 = 121.6922384   |
| AHCN2 = 122.971844    | RCC10 = 1.45230819     | DCCCC14 = -0.29675164  |
| DHCNH1 = -0.29330991  | ACCC9 = 117.3463214    | RCH17 = 1.06974569     |
| RCN4 = 1.29451412     | DCCCN8 = 0             | AHCC16 = 118.0111284   |
| ANCN3 = 111.3272858   | RCC11 = 1.44629463     | DHCCC15 = 179.4547029  |
| DNCNH2 = -180.3139217 | ACCC10 = 121.2810303   | RCC18 = 1.35528429     |
| RCN5 = 1.40416116     | DCCCC9 = 90            | ACCC17 = 119.1370115   |
| ACNC4 = 106.9817349   | RCH12 = 1.06979965     | DCCCC16 = 0.28239262   |
| DCNCN3 = 0.09988309   | AHCC11 = 116.9967609   | RCH19 = 1.06950943     |
| RCC6 = 1.42591649     | DHCCC10 = 0.43704345   | AHCC18 = 117.0597671   |
| ACCN5 = 109.6378464   | RCC13 = 1.35931323     | DHCCC17 = -178.5201507 |
| DCCNC4 = -0.09665712  | ACCC12 = 121.7935141   | RCO20 = 1.33175469     |
| RCO7 = 1.2503832      | DCCCC11 = -178.9149306 | AOCC19 = 116.197593    |
| AOCN6 = 125.0408595   | RCH14 = 1.07264526     | DOCCC18 = -179.7250438 |
| DOCNC5 = -180.0819668 | AHCC13 = 121.2816187   | ROH21 = 0.95245584     |
| RCC8 = 1.39570015     | DHCCC12 = 179.7369214  | AHOC20 = 117.5897216   |
| ACCC7 = 128.091763    | RCC15 = 1.41119446     | DHOCC19 = 178.7        |

State Energies:  $E(S_0) = -641.639876961157 \text{ a.u.}$ ,  $E(S_1) = -641.506033089692 \text{ a.u.}$

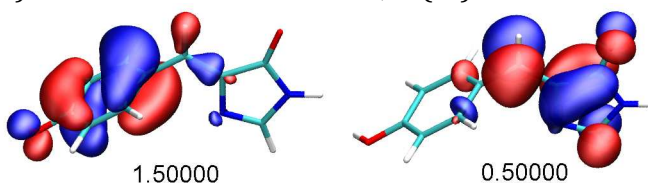

## IV: Propriety of the Electronic Structure Ansatz

Here, we present data, which we obtained in order to verify that the SA2-CAS(2,2)/6-31g electronic structure ansatz, used in the on-the-fly dynamics calculations, is reasonable. We do this by examining changes in the predicted geometries and energies of important critical points on the  $S_0$  and  $S_1$  surfaces. For the anion, three geometries are described: the Frank-Condon geometry ( $S_0$ -minimum), and two  $S_1$  minima, which are twisted about the phenoxy-methine (P- $S_1$ ) or imidazolinone-methine (I- $S_1$ ) bond. An analogous set was examined for the neutral form, but in this case there is no stable phenoxy-twisted form on the  $S_1$  state. Instead of P- $S_1$  as for the anion, we use a structure obtained by  $S_1$ -optimization under dihedral constraint on the phenoxy-methine bond. Each geometry was optimized using three model spaces: SA2-CAS(2,2)/6-31g, SA2-CAS(2,2)/6-31G\* and SA2-CAS(4,3)/6-31g\*. These data examine, therefore, the consequences both of enlarging the one-body basis or the many-body basis. Table S3.1 lists bond lengths (Å) for the optimized structures of the anion. Table S3.2 displays heavy-atom bond lengths (Å) for the neutral form, and Tables S3.1 and S3.2 list energetic and dipole data for the anion and neutral, respectively, evaluated with SA2-CAS(2,2)/6-31g, SA2-CAS(2,2)/6-31g\* and SA2-CAS(4,3)/6-31g\* with and without correction with MR-RSPT2. Only the highest 32 orbitals were correlated in the MR-RSPT2.

Comparisons can also be made with CASSCF and MRPT2 calculations in the existing literature. For example, Vendrell et al. report a vertical excitation energy of 3.69 eV for neutral HBI using single-state CAS(6,6)\*MR-RSPT2 calculations and a 6-31g basis set.<sup>13</sup> Martin et al.<sup>14</sup> and Sinicropi et al.<sup>15</sup> report a vertical excitation energy of 2.67 eV for anionic HBI using a SA2-CAS(12,11)\*MR-RSPT2 ansatz and a 6-31g\* basis set. The same authors report a difference dipole norm of 1.0 D for the  $S_0$ - $S_1$  transition in anionic HBI. All of these results are in close agreement with our own, confirming that our electronic structure methodology is appropriate for the problem.

**Table S3.1.** Heavy-atom bond lengths (Å) for  $S_0$  and  $S_1$  critical points for anionic HBI, optimized using three model spaces: SA2-CAS(2,2)/6-31g, SA2-CAS(2,2)/6-31G\* and SA2-CAS(4,3)/6-31G\*. As shown, the effect of enlarging the one-electron or many-electron bases is small. The bond alternation is maintained, indicating that each ansatz targets the same states.

SA2-CAS(2,2)/6-31g      SA2-CAS(2,2)/6-31G\*      SA2-CAS(4,3)/6-31G\*

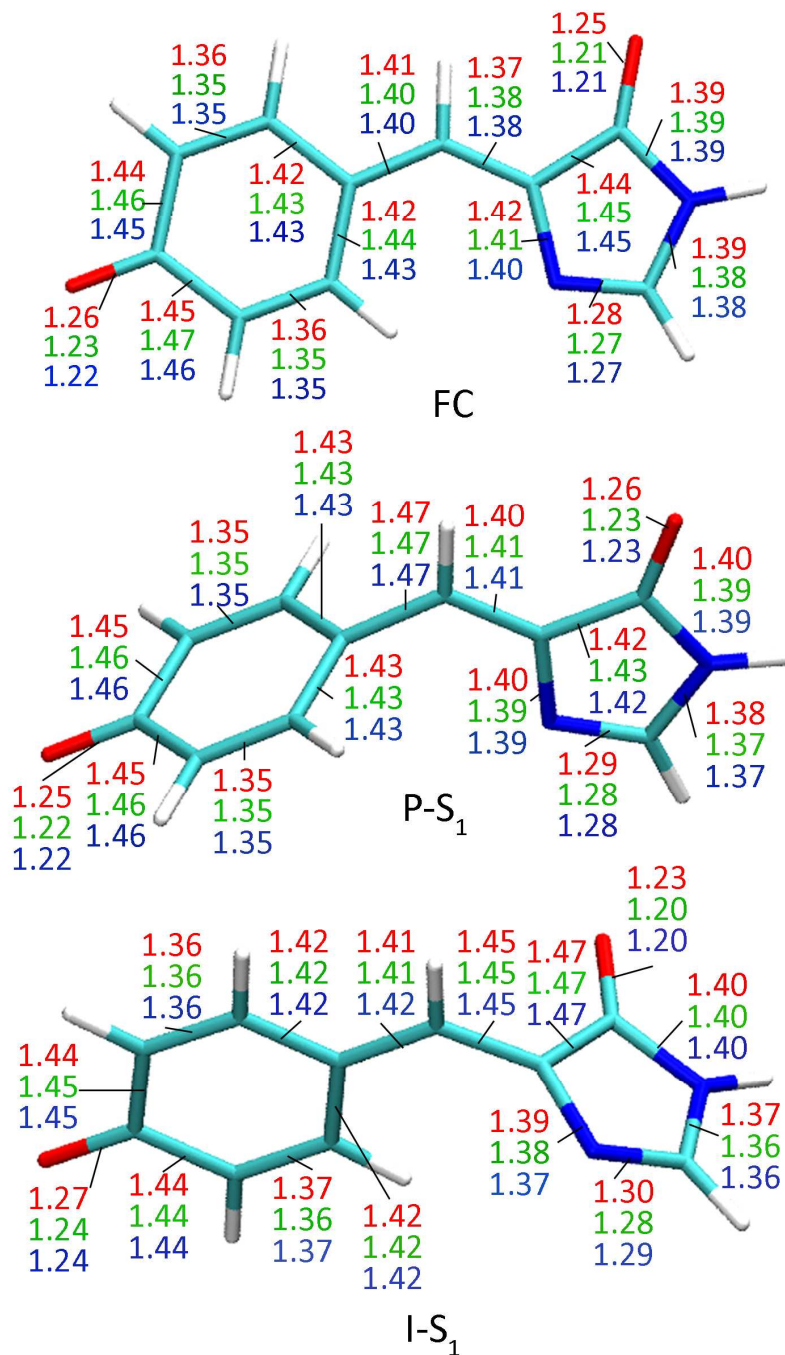

**Figure S3.2.** Heavy-atom bond lengths (Å) for  $S_0$  and  $S_1$  critical points for anionic HBI, optimized using three model spaces: SA2-CAS(2,2)/6-31g, SA2-CAS(2,2)/6-31G\* and SA2-CAS(4,3)/6-31G\*. Geometries are the Frank Condon geometry (FC, top), imidazolinone-twisted  $S_1$  minimum (I- $S_1$ , bottom right), and a structure minimized on  $S_1$  under constraint of a twisted phenoxy-methine bond (P- $S_{1c}$ , bottom left). This titration state has no stable  $S_1$  structure with a twisted phenoxy-methine bond. As shown, the effect of enlarging the one-electron or many-electron bases is small. The bond alternation is maintained, indicating that each ansatz targets the same states.

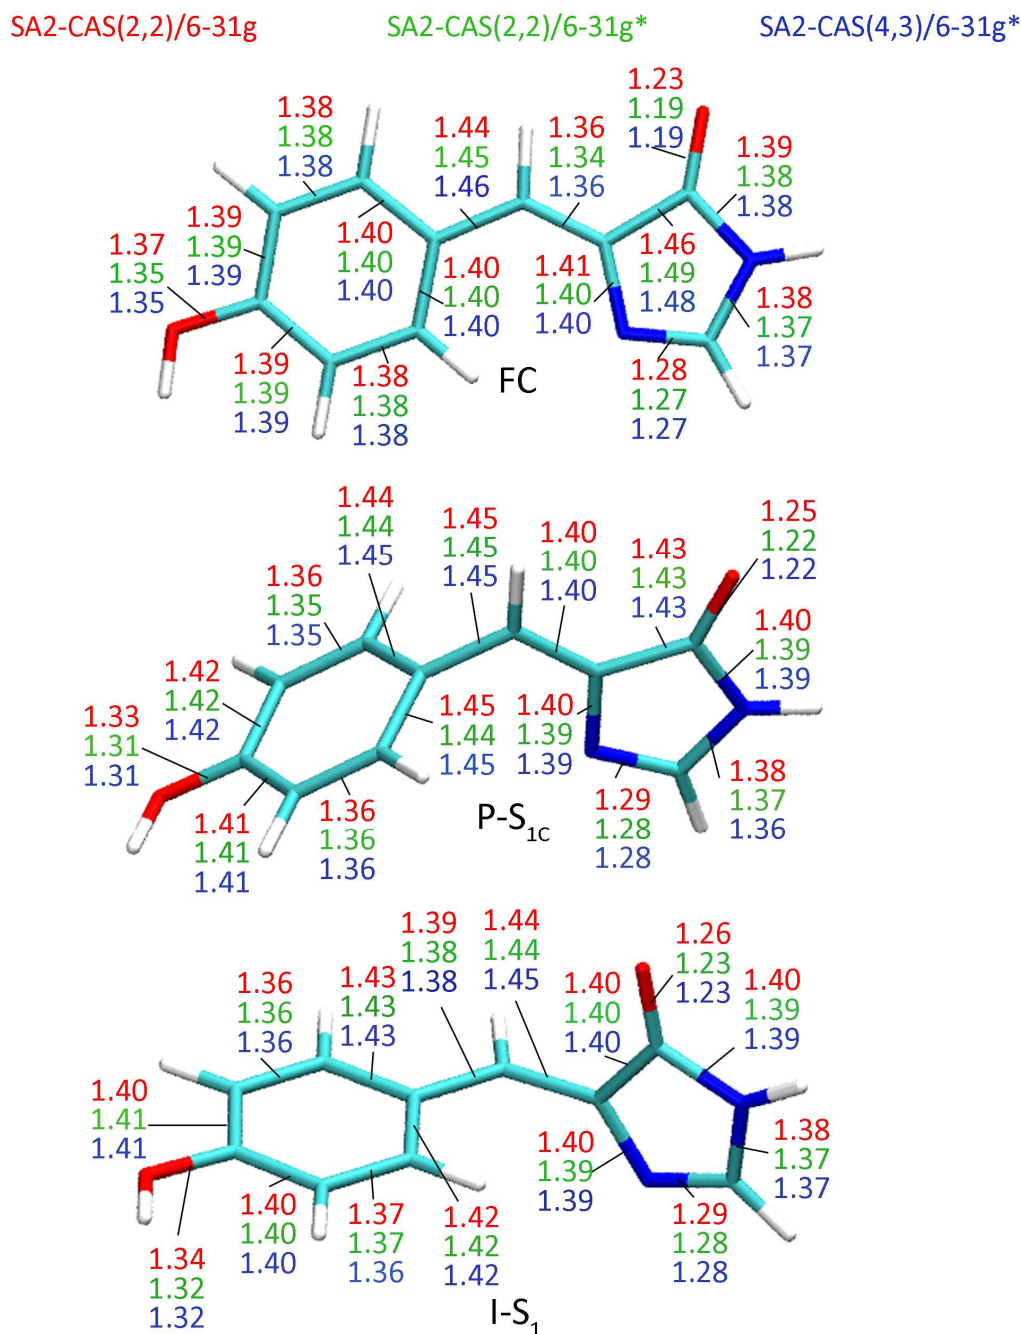



**Table S3.1.** State-specific energies (kcal/mol, relative to  $S_0$  energy at FC),  $S_0$ - $S_1$  excitation energies (eV), state-specific dipole norms,  $S_1$ - $S_0$  difference dipole norms and transition dipole norms (D) for the FC, I- $S_1$  and P- $S_1$  geometries of anionic HBI. Data were taken at geometries optimized with the CASSCF and basis specified. Italic quantities are calculated from the SA-CASSCF, while bold quantities include the correction applied by second order multi-reference Rayleigh-Schrödinger perturbation theory (MR-RSPT2). MR-RSPT2 calculations correlated the highest 32 occupied orbitals of the reference space.

| Geo.     | CAS   | Bas.   | E( $S_0$ )                 | E( $S_1$ )                 | $\Delta E(S_1-S_0)$        | $ \mu(S_0) $               | $ \mu(S_1) $               | $ \Delta\mu $              | $ \langle S_0 \mu S_1\rangle $ |
|----------|-------|--------|----------------------------|----------------------------|----------------------------|----------------------------|----------------------------|----------------------------|--------------------------------|
| FC       | (2,2) | 6-31g  | <i>0.0</i><br><b>0.0</b>   | <i>95.9</i><br><b>58.9</b> | <i>4.16</i><br><b>2.56</b> | <i>7.4</i><br><b>7.5</b>   | <i>8.0</i><br><b>7.9</b>   | <b>0.6</b><br><b>0.5</b>   | <i>9.6</i><br><b>9.5</b>       |
| FC       | (2,2) | 6-31g* | <i>0.0</i><br><b>0.0</b>   | <i>98.1</i><br><b>60.3</b> | <i>4.25</i><br><b>2.61</b> | <i>7.5</i><br><b>7.6</b>   | <i>7.5</i><br><b>7.5</b>   | <i>0.1</i><br><b>0.2</b>   | <i>9.3</i><br><b>9.2</b>       |
| FC       | (4,3) | 6-31g* | <i>0.0</i><br><b>0.0</b>   | <i>94.7</i><br><b>62.5</b> | <i>4.11</i><br><b>2.71</b> | <i>8.1</i><br><b>7.9</b>   | <i>6.8</i><br><b>6.7</b>   | <i>1.3</i><br><b>1.2</b>   | <i>10.0</i><br><b>9.6</b>      |
| I- $S_1$ | (2,2) | 6-31g  | <i>48.3</i><br><b>31.8</b> | <i>66.3</i><br><b>49.4</b> | <i>0.78</i><br><b>0.77</b> | <i>3.3</i><br><b>3.0</b>   | <i>15.0</i><br><b>14.5</b> | <i>13.7</i><br><b>13.1</b> | <i>0.1</i><br><b>0.1</b>       |
| I- $S_1$ | (2,2) | 6-31g* | <i>49.7</i><br><b>34.7</b> | <i>64.0</i><br><b>49.2</b> | <i>0.62</i><br><b>0.63</b> | <i>2.5</i><br><b>2.4</b>   | <i>14.1</i><br><b>13.7</b> | <i>13.4</i><br><b>12.8</b> | <i>0.2</i><br><b>0.2</b>       |
| I- $S_1$ | (4,3) | 6-31g* | <i>44.5</i><br><b>34.8</b> | <i>69.5</i><br><b>50.3</b> | <i>1.08</i><br><b>0.67</b> | <i>2.3</i><br><b>2.1</b>   | <i>15.0</i><br><b>14.5</b> | <i>15.2</i><br><b>14.4</b> | <i>0.2</i><br><b>0.2</b>       |
| P- $S_1$ | (2,2) | 6-31g  | <i>42.7</i><br><b>28.0</b> | <i>66.3</i><br><b>48.4</b> | <i>1.02</i><br><b>0.88</b> | <i>14.3</i><br><b>13.6</b> | <i>3.3</i><br><b>2.7</b>   | <i>16.2</i><br><b>15.0</b> | <i>0.1</i><br><b>0.0</b>       |
| P- $S_1$ | (2,2) | 6-31g* | <i>40.6</i><br><b>27.3</b> | <i>68.1</i><br><b>52.3</b> | <i>1.19</i><br><b>1.08</b> | <i>13.7</i><br><b>13.2</b> | <i>3.0</i><br><b>2.6</b>   | <i>15.4</i><br><b>14.4</b> | <i>0.1</i><br><b>0.1</b>       |
| P- $S_1$ | (4,3) | 6-31g* | <i>35.0</i><br><b>27.6</b> | <i>73.7</i><br><b>53.1</b> | <i>1.68</i><br><b>1.11</b> | <i>14.5</i><br><b>13.8</b> | <i>3.2</i><br><b>2.7</b>   | <i>16.6</i><br><b>15.5</b> | <i>0.1</i><br><b>0.1</b>       |

**Table S3.2.** State-specific energies (kcal/mol, relative to  $S_0$  energy at FC),  $S_0$ - $S_1$  excitation energies (eV), state-specific dipole norms,  $S_1$ - $S_0$  difference dipole norms and transition dipole norms (D) for the FC, I- $S_1$  and P- $S_1$  geometries of neutral HBI. Data were taken at geometries optimized with the CASSCF and basis specified. Italic quantities are calculated from the SA-CASSCF, while bold quantities include the correction applied by second order multi-reference Rayleigh-Schrödinger perturbation theory (MR-RSPT2). MR-RSPT2 calculations correlated the highest 32 occupied orbitals of the reference space.

| Geo.        | CAS   | Bas.   | $E(S_0)$                   | $E(S_1)$                     | $\Delta E(S_1-S_0)$        | $ \mu(S_0) $             | $ \mu(S_1) $               | $ \Delta\mu(S_1-S_0) $     | $ \langle S_0 \mu S_1\rangle $ |
|-------------|-------|--------|----------------------------|------------------------------|----------------------------|--------------------------|----------------------------|----------------------------|--------------------------------|
| FC          | (2,2) | 6-31g  | <i>0.0</i><br><b>0.0</b>   | <i>116.2</i><br><b>86.2</b>  | <i>5.03</i><br><b>3.74</b> | <i>3.9</i><br><b>4.0</b> | <i>5.2</i><br><b>5.1</b>   | <i>3.0</i><br><b>3.0</b>   | <i>7.0</i><br><b>7.2</b>       |
| FC          | (2,2) | 6-31g* | <i>0.0</i><br><b>0.0</b>   | <i>119.2</i><br><b>87.8</b>  | <i>5.17</i><br><b>3.79</b> | <i>3.8</i><br><b>3.8</b> | <i>5.1</i><br><b>5.1</b>   | <i>3.3</i><br><b>3.5</b>   | <i>7.3</i><br><b>7.3</b>       |
| FC          | (4,3) | 6-31g* | <i>0.0</i><br><b>0.0</b>   | <i>121.7</i><br><b>89.9</b>  | <i>5.27</i><br><b>3.90</b> | <i>3.9</i><br><b>3.9</b> | <i>7.3</i><br><b>6.7</b>   | <i>6.8</i><br><b>6.0</b>   | <i>7.6</i><br><b>7.3</b>       |
| I- $S_1$    | (2,2) | 6-31g  | <i>61.7</i><br><b>39.7</b> | <i>76.5</i><br><b>67.2</b>   | <i>0.64</i><br><b>1.19</b> | <i>4.9</i><br><b>4.5</b> | <i>9.2</i><br><b>9.2</b>   | <i>11.8</i><br><b>11.4</b> | <i>0.1</i><br><b>0.0</b>       |
| I- $S_1$    | (2,2) | 6-31g* | <i>62.0</i><br><b>41.2</b> | <i>78.9</i><br><b>67.6</b>   | <i>0.73</i><br><b>1.14</b> | <i>4.5</i><br><b>4.1</b> | <i>9.5</i><br><b>9.5</b>   | <i>11.7</i><br><b>11.3</b> | <i>0.1</i><br><b>0.0</b>       |
| I- $S_1$    | (4,3) | 6-31g* | <i>66.1</i><br><b>47.4</b> | <i>77.8</i><br><b>70.7</b>   | <i>0.51</i><br><b>1.01</b> | <i>4.7</i><br><b>4.2</b> | <i>10.7</i><br><b>10.4</b> | <i>13.4</i><br><b>12.6</b> | <i>0.1</i><br><b>0.1</b>       |
| P- $S_{1C}$ | (2,2) | 6-31g  | <i>31.2</i><br><b>8.3</b>  | <i>115.3</i><br><b>99.7</b>  | <i>3.65</i><br><b>3.97</b> | <i>3.0</i><br><b>3.1</b> | <i>14.7</i><br><b>14.1</b> | <i>14.7</i><br><b>13.5</b> | <i>0.2</i><br><b>0.2</b>       |
| P- $S_{1C}$ | (2,2) | 6-31g* | <i>30.1</i><br><b>8.8</b>  | <i>116.2</i><br><b>99.7</b>  | <i>3.74</i><br><b>3.94</b> | <i>3.0</i><br><b>3.1</b> | <i>14.4</i><br><b>13.8</b> | <i>14.7</i><br><b>13.4</b> | <i>0.2</i><br><b>0.2</b>       |
| P- $S_{1C}$ | (4,3) | 6-31g* | <i>22.4</i><br><b>11.2</b> | <i>122.3</i><br><b>103.3</b> | <i>4.33</i><br><b>3.99</b> | <i>3.1</i><br><b>3.2</b> | <i>14.2</i><br><b>13.7</b> | <i>14.4</i><br><b>13.4</b> | <i>0.1</i><br><b>0.1</b>       |

## **V: Two-Dimensional Interpolation Surfaces for Neutral and Anionic HBI with different active spaces**

This section contains 2-dimensional linear interpolation (synchronous transit) surfaces for neutral and anionic HBI calculated using SA-CASSCF and MR-RSPT2 theoretical models with 2-electron, 2-orbital and 4-electron, 3-orbital active spaces. They show that the features of the potential surface are well-converged at the level of the SA2-CAS(2,2) ansatz which was used for the AIMS dynamical simulations.

The two-dimensional interpolations were generated from three anchor geometries for each ionic form. For the anion, the anchors were the Frank-Condon (FC) geometry ( $S_0$  minimum), and excited state minima twisted about the imidazolinone (I- $S_1$ ) and phenoxy (P- $S_1$ ) bonds of the chromophore. For the neutral form, the Frank-Condon geometry and an imidazolinone twisted minimum were also used. There is no phenoxy-twisted stable minimum for neutral HBI, so the third anchor was a  $S_1$  relaxed geometry that was constrained to be twisted about the phenoxy bond and planar about the imidazolinone bond (P- $S_{1c}$ ). The geometries were optimized on the SA2-CAS(2,2) surfaces.

The similarity between the results obtained for 2-electron, 2-orbital and 4-electron, 3-orbital active spaces shows that the dynamics should be robust. If the two-electron, two-orbital active space was not sufficient, then we would expect to see an initial large change in the behavior upon enlargement of the active space, followed by decreasing effects with further increases in the active space rank. The lack of change seen here shows that the rank is sufficient.

The linear interpolation slices in Fig. 2 of the main text are diagonal slices through the 2-D interpolations in Fig. S4.1 (anion) and Fig. S4.2 (neutral) at the same level of theory.

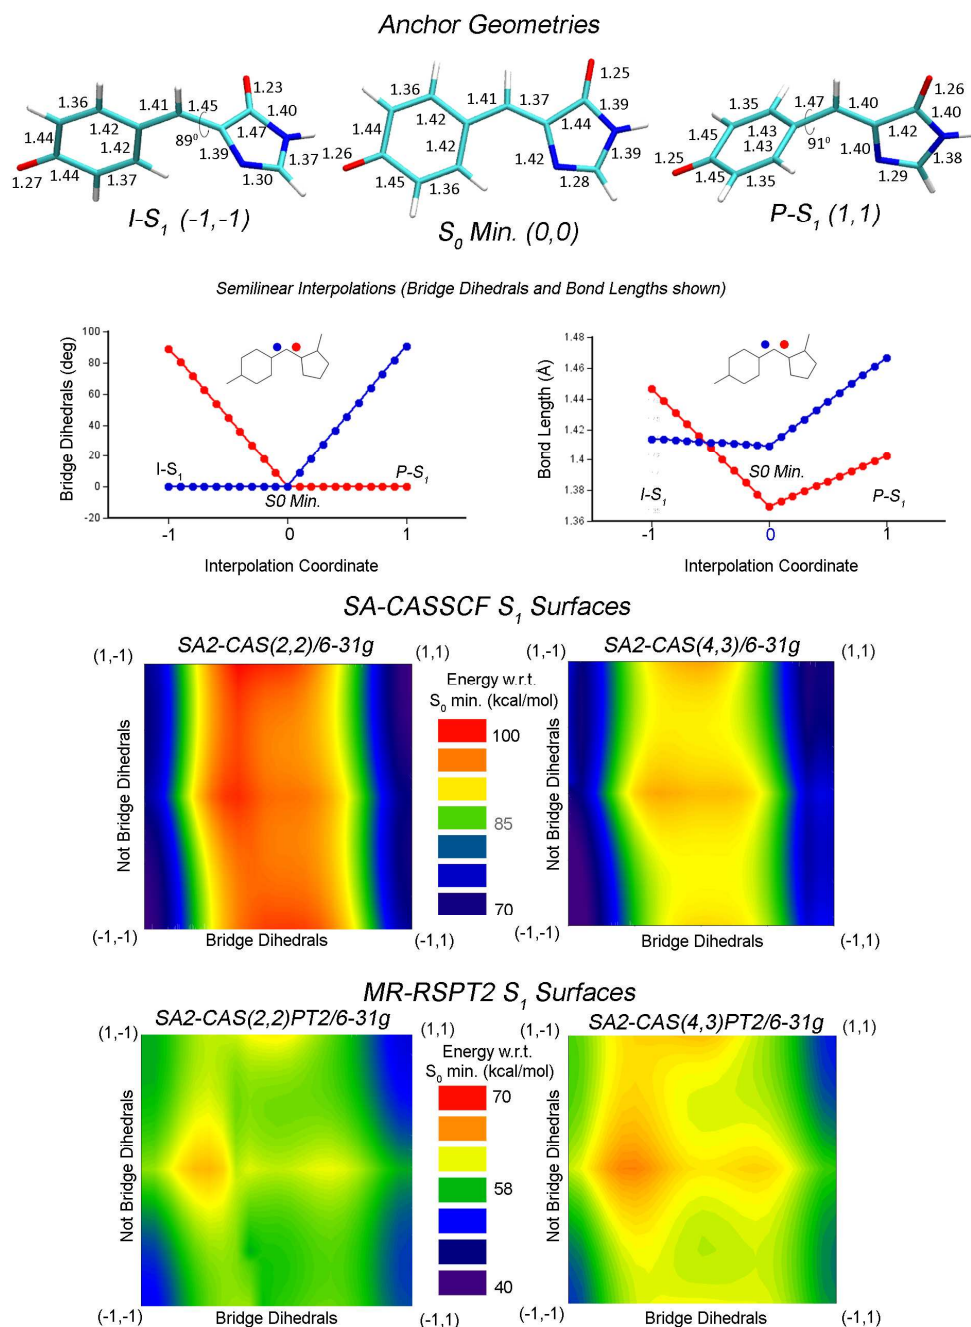

**Figure S4.1.** *Top:* SA2-CAS(2,2)/6-31g optimized imidazolinone-twisted *S<sub>1</sub>* minimum (*I-S<sub>1</sub>*, left), *S<sub>0</sub>* minimum (*S<sub>0</sub> Min*, center) and phenoxy-twisted *S<sub>1</sub>* minimum (*P-S<sub>1</sub>*, right). *Middle:* Bilinear interpolation pathways in symbolic Z-matrix variables connecting *I-S<sub>1</sub>*, *S<sub>0</sub> Min* and *P-S<sub>1</sub>* min (bridge dihedrals and bond lengths shown). *Bottom:* 2-dimensional synchronous semilinear transit surfaces calculated with different methodologies. Z-matrix variables were partitioned into two sets, one containing bridge dihedrals and one containing everything else. The horizontal coordinate parametrizes synchronous parabolic transit along the paths of the bridge dihedrals; the vertical coordinate parametrizes synchronous semilinear transit along the paths of the remaining Z-matrix variables (the latter set includes the bridge bonds shown above).

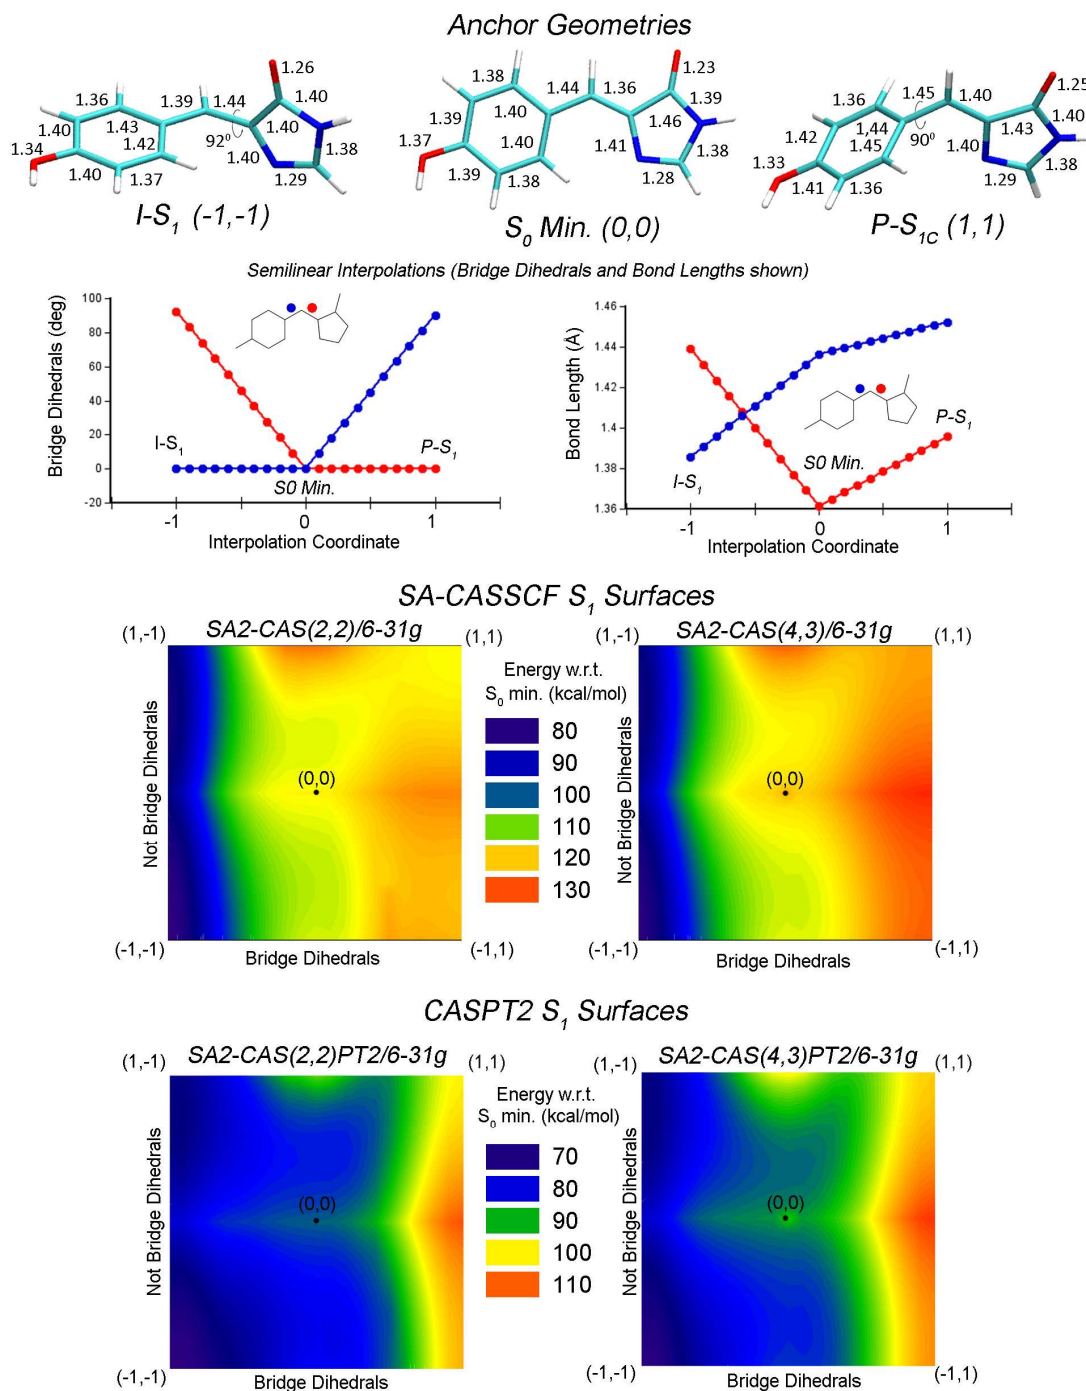

**Figure S4.2.** *Top:* SA2-CAS(2,2)/6-31g optimized imidazolinone-twisted *S<sub>1</sub>* minimum (*I-S<sub>1</sub>*, left), *S<sub>0</sub>* minimum (*S<sub>0</sub> Min*, center) and phenoxy-constrained *S<sub>1</sub>* relaxed geometry (*P-S<sub>1C</sub>*, right) of neutral HBI. *Middle:* Bilinear interpolation pathways in symbolic Z-matrix variables connecting *I-S<sub>1</sub>*, *S<sub>0</sub> Min* and *P-S<sub>1</sub>* min (bridge dihedrals and bond lengths shown). *Bottom:* 2-dimensional synchronous semilinear transit surfaces calculated with different methodologies. Z-matrix variables were partitioned into two sets, one containing bridge dihedrals and one containing everything else. The horizontal coordinate parametrizes synchronous parabolic transit along the paths of the bridge dihedrals; the vertical coordinate parametrizes synchronous semilinear transit along the paths of the remaining Z-matrix variables (the latter set includes the bridge bonds shown above).

## IV: References

- (1) Levine, B. G.; Coe, J. D.; Virshup, A. M.; Martínez, T. J., *Chem. Phys.* **2008**, *347*, 3-16.
- (2) MOLPRO, version 2008.1, a package of ab initio programs, H.-J. Werner, P. J. Knowles, R. Lindh, F. R. Manby, M. Schütz, P. Celani, T. Korona, A. Mitrushenkov, G. Rauhut, T. B. Adler, R. D. Amos, A. Bernhardsson, A. Berning, D. L. Cooper, M. J. O. Deegan, A. J. Dobbyn, F. Eckert, E. Goll, C. Hampel, G. Hetzer, T. Hrenar, G. Knizia, C. Köppl, Y. Liu, A. W. Lloyd, R. A. Mata, A. J. May, S. J. McNicholas, W. Meyer, M. E. Mura, A. Nicklass, P. Palmieri, K. Pflüger, R. Pitzer, M. Reiher, U. Schumann, H. Stoll, A. J. Stone, R. Tarroni, T. Thorsteinsson, M. Wang, and A. Wolf, , see <http://www.molpro.net>.
- (3) Stalring, J.; Bernhardsson, A.; Lindh, R., *Mol. Phys.* **2001**, *99*, 103-114.
- (4) Roos, B. O. In *Ab Initio Methods in Quantum Chemistry II*; Lawley, K. P., Ed.; John Wiley and Sons: New York, 1987, p 399.
- (5) Frisch, M. J.; Pople, J. A.; Binkley, J. S., *J. Chem. Phys.* **1984**, *80*, 3265-3269.
- (6) Hehre, W. J.; Ditchfield, R.; Pople, J. A., *J. Chem. Phys.* **1972**, *56*, 2257-2261.
- (7) Krishnan, R.; Binkley, J. S.; Pople, J. A., *J. Chem. Phys.* **1980**, *72*, 650-654.
- (8) Møller, C.; Plesset, M. S., *Phys. Rev.* **1934**, *46*, 618.
- (9) Celani, P.; Werner, H.-J., *J. Chem. Phys.* **2000**, *112*, 5546-5557.
- (10) Tsien, R. Y., *Ann. Rev. Biochem.* **1998**, *67*, 509-544.
- (11) Nielsen, S. B.; Lapierre, A.; Andersen, J. U.; Pedersen, U. V.; Tomita, S.; Anderson, L. H., *Phys. Rev. Lett.* **2001**, *87*, 228102/1-4.
- (12) Lammich, L.; Petersen, M. A.; Nielsen, M. B.; Andersen, L. H., *Biophys. J.* **2007**, *92*, 201-207.
- (13) Vendrell, O.; Gelabert, R.; Moreno, M.; Lluch, J. M., *Chem. Phys. Lett.* **2004**, *396*, 202-207.
- (14) Martin, M. E.; Negri, F.; Olivucci, M., *J. Am. Chem. Soc.* **2004**, *126*, 5452-5464.
- (15) Sinicropi, A.; Andruniow, T.; Ferré, N.; Basosi, R.; Olivucci, M., *J. Am. Chem. Soc.* **2005**, *127*, 11534-11535.
